# Supplementary figures and images for: Loss of Progranulin Expression Decreases NLRP3 Inflammasome-Mediated Inflammation and Enhances Bone Anabolism
Source: Research Square preprint supplement (doi:10.21203/rs.3.rs-9441627/v1), 2026-05-06

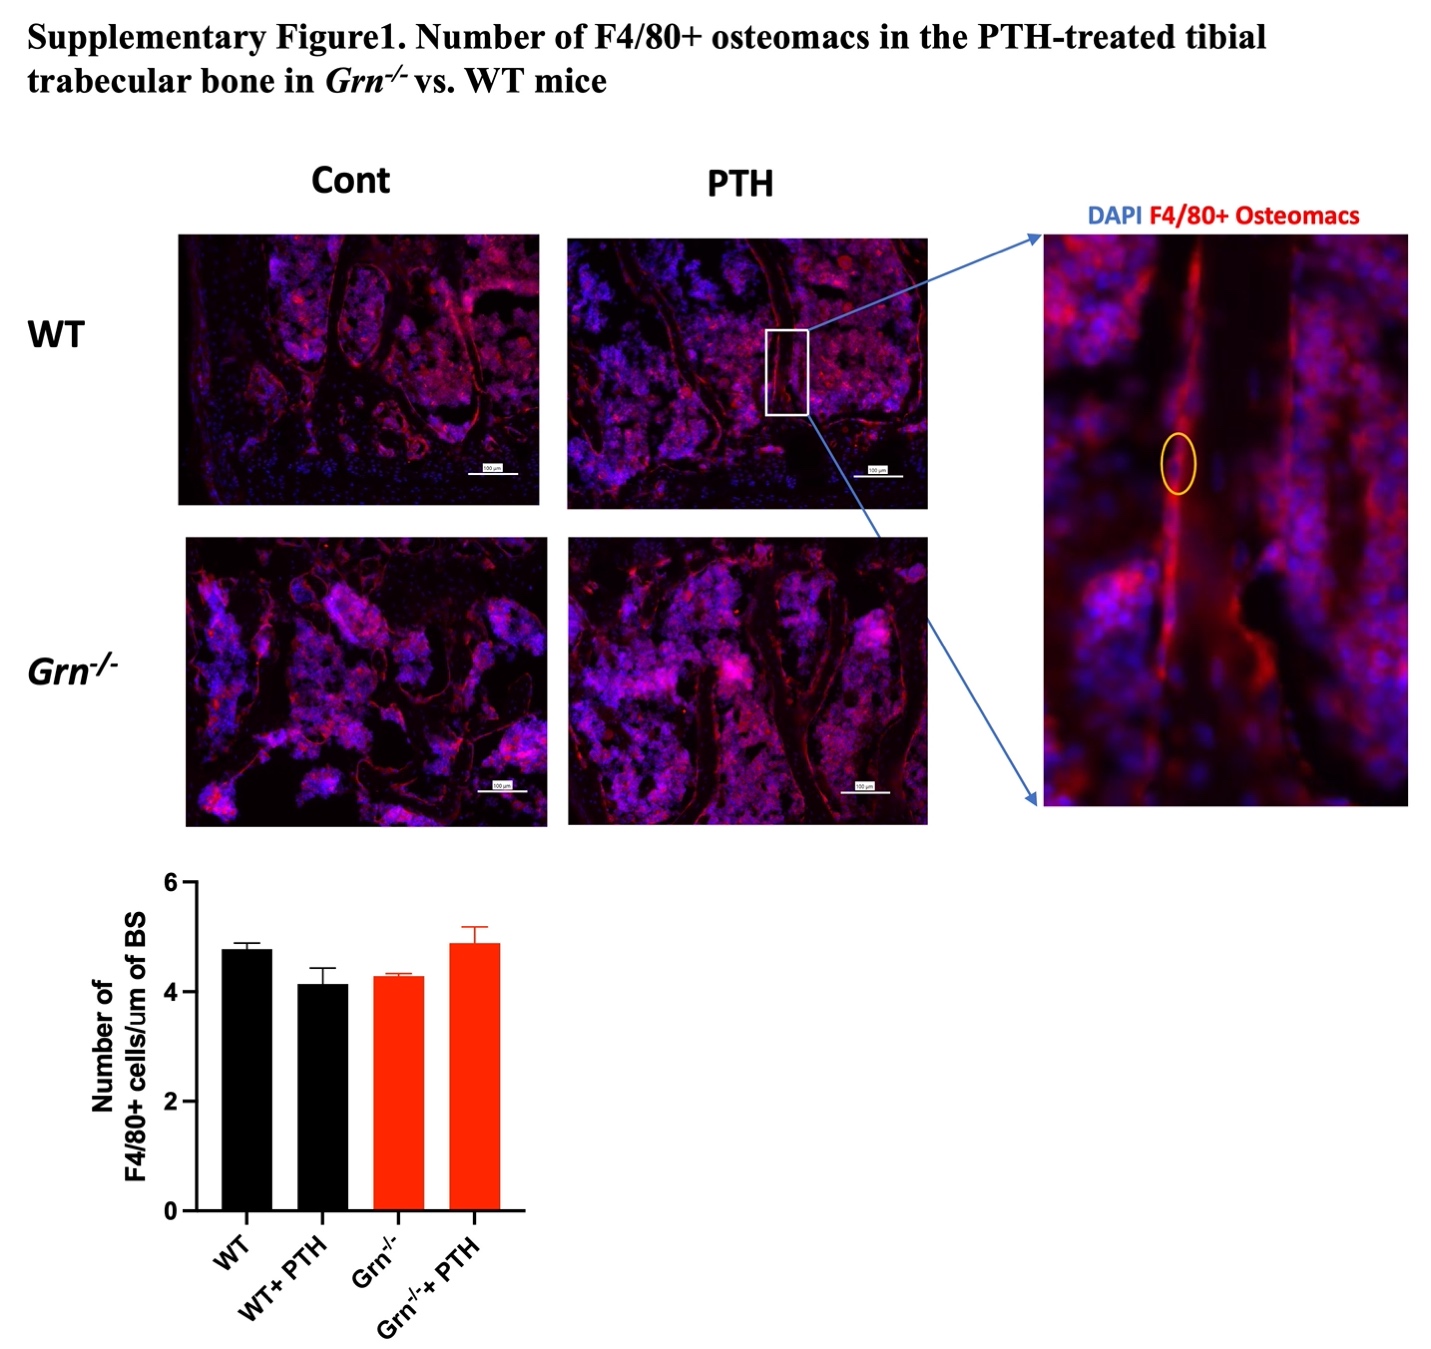

Supplement: Supplementary file 1 [file 09a994333ccac748bf98b60a.docx]
